# Supplementary material
Source: HighWire-hosted journal article supplement (https://tobaccocontrol.bmj.com/content/28/2/146)
Supplement: inline-supplementary-material-3 [file inline-supplementary-material-3.pdf]

**Supplemental Tables:**

Supplemental Table 3. Characteristics of Instagram Posts by the Official JUUL Account (As of February 15<sup>th</sup>, 2018)

| Category                     | # of Posts | # of Likes    | # of Comments | Types        | # of Posts | # of Likes    | # of Comments | Year         | # of Posts | # of Likes    | # of Comments |
|------------------------------|------------|---------------|---------------|--------------|------------|---------------|---------------|--------------|------------|---------------|---------------|
| Cartoon Images               | 1          | 277           | 28            | Picture      | 123        | 88,196        | 7,448         | 2016         | 26         | 4,820         | 1,313         |
| Celebrity/Model Images       | 5          | 2,491         | 130           | GIF          | 3          | 1,134         | 115           | 2017         | 73         | 59,465        | 4,870         |
| Customer feedback/ Testimony | 21         | 6,541         | 1,319         | Video        | 3          | 2,070         | 172           | 2018         | 30         | 27,115        | 1,552         |
| Fashion Images               | 5          | 3,721         | 224           |              |            |               |               |              |            |               |               |
| Flavor Images                | 15         | 6,226         | 1,457         |              |            |               |               |              |            |               |               |
| Lifestyle Appeal Images      | 43         | 27,352        | 1,579         |              |            |               |               |              |            |               |               |
| Sponsored Events             | 1          | 1,105         | 35            |              |            |               |               |              |            |               |               |
| Product Images               | 38         | 42,687        | 2,963         |              |            |               |               |              |            |               |               |
| <b>Total</b>                 | <b>129</b> | <b>90,400</b> | <b>7,735</b>  | <b>Total</b> | <b>129</b> | <b>90,400</b> | <b>7,735</b>  | <b>Total</b> | <b>129</b> | <b>90,400</b> | <b>7,735</b>  |
